# Supplementary material for: Genetic Assessment of Consecutively Recruited Dystonia Cases from a Single Center
Source: Research Square preprint supplement (doi:10.21203/rs.3.rs-8625823/v1), 2026-01-30
Supplement: Supplementary file 1 [file 0055d4b88d6bc02a4969f3da.docx]

**Supplementary Material**

[S1 Clinical Characteristics of the patients with the pathogenic or likely pathogenic variants 2](#_Toc219472761)

[S2 Clinical Characteristics of the patients with VUS 2](#_Toc219472762)

[S3 Pedigrees of the Families with Diagnostic Variants 4](#_Toc219472763)

[S4 Diagnostic rates and study populations in recent studies 5](#_Toc219472764)

[S5 List of the Common and Distinct Genes implicated in different diagnostic groups by study 6](#_Toc219472765)

# **S1 Clinical Characteristics of the patients with the pathogenic or likely pathogenic variants**

| **Patient ID** | **Clinical Characteristics** |
| --- | --- |
| 28382 | Myoclonus-dystonia. AO: 37. No other neurological symptoms. |
| 10369 | Generalized dystonia. AO:20. No family history. |
| 3137 | Generalized dystonia. AO:6. Positive family history. |
| 10398 | Focal dystonia. Subtype: Cervical dystonia. AO:17. No family history. |
| 21103 | Focal dystonia. Subtype: Cervical dystonia. AO:20. No family history. |
| 21339 | Focal dystonia. AO:40. Positive family history. |
| 29928 | Cervical dystonia, tremor. AO:48. |
| 28963 | Focal dystonia and hemifacial Spasm. AO:32. No other neurological symptoms. No family history. |
| 28259 | Left lateral Collis, generalized myoclonus, choreiform movement disorders, ataxic gait, hypothyroidism, generalized epileptic seizure. AO:1. No family history. |
| 21307 | Subtype: Cervical dystonia, Tremor. AO: 70. MRI: Steep cervical spine with slight retro curves in the middle and lower cervical thirds. Positive family history. |
| 15242 | Generalized dystonia. AO: 1. No other symptoms. No family history. |

# **S2 Clinical Characteristics of the patients with VUS**

| **ID** | **Body Distribution of Dystonia** | **Type of Dystonia** | **Variant** |
| --- | --- | --- | --- |
| 13479 | Generalized | Isolated | KMT2B:NM_014727:c.4463G>A:p.R1488Q |
| 14406 | Focal | Isolated | COL4A1:NM_001303110:c.7C>A:p.P3T |
| 17709 | Segmental | Isolated | PANK2:NM_153638:c.131G>T:p.R44L |
| 25185 | Generalized | Isolated | PI4KA:NM_058004:c.2665A>G:p.M889V |
| 27678 | Focal | Combined | FUS:NM_004960:c.1240G>A:p.G414S: |
| 27765 | Generalized | Combined | ATP7B:NM_001005918:c.1621G>A:p.E541K |
| 28122 | Focal | Combined | PDGFB:NM_002608:c.115C>A:p.R39S |
| 28338 | Segmental | Isolated | HECW2:NM_020760:c.3040A>G:p.I1014V |
| 29711 | Focal | Isolated | SPR:NM_003124:c.472C>G:p.L158V |
| 29735 | Focal | Combined | DHX30:NM_138615:c.87G>A:p.M29I |
| 29848 | Focal | Combined | AFG3L2:NM_006796:c.790A>G:p.I264V |
| 29988 | Focal | Combined | TH:NM_199292:c.67G>A:p.A23T |
| 30303 | Focal | Isolated | GNAL:NM_182978:c.265G>A:p.A89T |
| 30617 | Focal | Combined | TRPM7:NM_017672:c.4084C>T:p.P1362S |
| 30793 | Focal | Isolated | CACNA1A:NM_023035:c.7091G>A:p.G2362D |
| 30957 | Focal | Combined | LRRK2:NM_198578:c.3683G>C:p.S1228T |
| 31171 | Focal | Isolated | ADCY5:NM_183357:c.2818G>A:p.E940K |
| 31191 | Focal | Isolated | CACNA1B:NM_001243812:c.4738C>T:p.R1580C |
| 31291 | Focal | Combined | PPP2R2B:NM_181677:c.647A>G:p.N216S |
| 31302 | Focal | Isolated | TET3:NM_001287491:c.55G>A:p.D19N |
| 31378 | Focal | Combined | SGCE:NM_001099401:c.391T>C:p.I131V |
| 31527 | Focal | Combined | NKX2-1:NM_001079668:c.1187T>C:p.L396P |
| 31568 | Focal | Combined | VPS4A:NM_013245:c.1226G>A:p.R409Q |
| 31616 | Generalized | Isolated | RELN:NM_005045:c.139G>A:p.E47K |
| 31742 | Segmental | Combined | ANO3:NM_001313727:c.2374G>A:p.V792I |
| 31813 | Focal | Combined | HIVEP2:NM_006734:c.7163A>G:p.D2388G |
| 32070 | Focal | Isolated | IFIH1:NM_022168:c.A802delAGAAGGAAGTGTCAGC-:p.S268delEGSVS |
| 32175 | Focal | Isolated | PLA2G6:NM_001199562:c.101C>T:p.S34L |
| 32294 | Focal | Isolated | SCN8A:NM_001177984:c.4612T>C:p.Y1538H |
| 32498 | Generalized | Isolated | GCH1:NM_001024024:c.328C>G:p.Q110E |
| 32602 | Focal | Isolated | PPP2R2B:NM_181677:c.881G>A:p.R294H |
| 32714 | Focal | Isolated | KMT2B:NM_014727:c.3895G>T:p.A1299S |
| 32719 | Focal | Isolated | IRF2BPL:NM_024496:c.1220C>T:p.A407V |
| 32743 | Generalized | Isolated | THAP1:NM_018105:c.238A>G:p.I80V |
| 32758 | Focal | Isolated | PRRT2:NM_001256443:c.224C>T:p.P75L |
| 33086 | Focal | Combined | CACNA1B:NM_000718:c.6965C>T:p.S2322L |
| 33427 | Generalized | Combined | PRKRA:NM_001316362:c.365G>C:p.S122T |
| 33487 | Generalized | Isolated | TUBB4A exon4 duplication |
| 33499 | Focal | Isolated | CBS:NM_000071:c.1643G>A:p.R548Q |
| 33583 | Focal | Combined | SCN8A:NM_001177984:c.3685C>T:p.R1229C |
| 33607 | Focal | Isolated | CACNA1A:NM_000068:c.3052G>A:p.E1018K: |
| 33698 | Focal | Isolated | HIVEP2:NM_006734:c.944T>G:p.L315W |
| 33845 | Focal | Combined | SGCE:NM_001099400:c.1280G>A:p.R427H |
| 34491 | Focal | Isolated | LRRK2:NM_198578:c.2248G>A:p.E750K |
| 35053 | Focal | Isolated | KMT2B:NM_014727:c.G6754ins+CCCCC |
| 35126 | Focal | Isolated | ADCY5:NM_183357:c.1024C>G:p.L342V |
| 35271 | Focal | Isolated | PLA2G6:NM_003560:c.1267G>A:p.A423T |
| 35446 | Focal | Isolated | KMT2B:NM_014727:c.1391C>T:p.T464M |
| 35473 | Focal | Combined | PANK2:NM_153638:c.796G>A:p.V266M |
| 35496 | Focal | Isolated | ALDH18A1:NM_002860:c.211A>G:p.K71E |
| 35695 | Focal | Isolated | PRKAR1B:NM_001164759:c.949C>T:p.R317C |
| 36131 | Focal | Combined | CACNA1A:NM_000068:c.3187C>T:p.P1063S |
| 36606 | Generalized | Combined | SPTBN1:NM_178313:c.2210A>G:p.Q737R |

# **S3 Pedigrees of the Families with Diagnostic Variants**


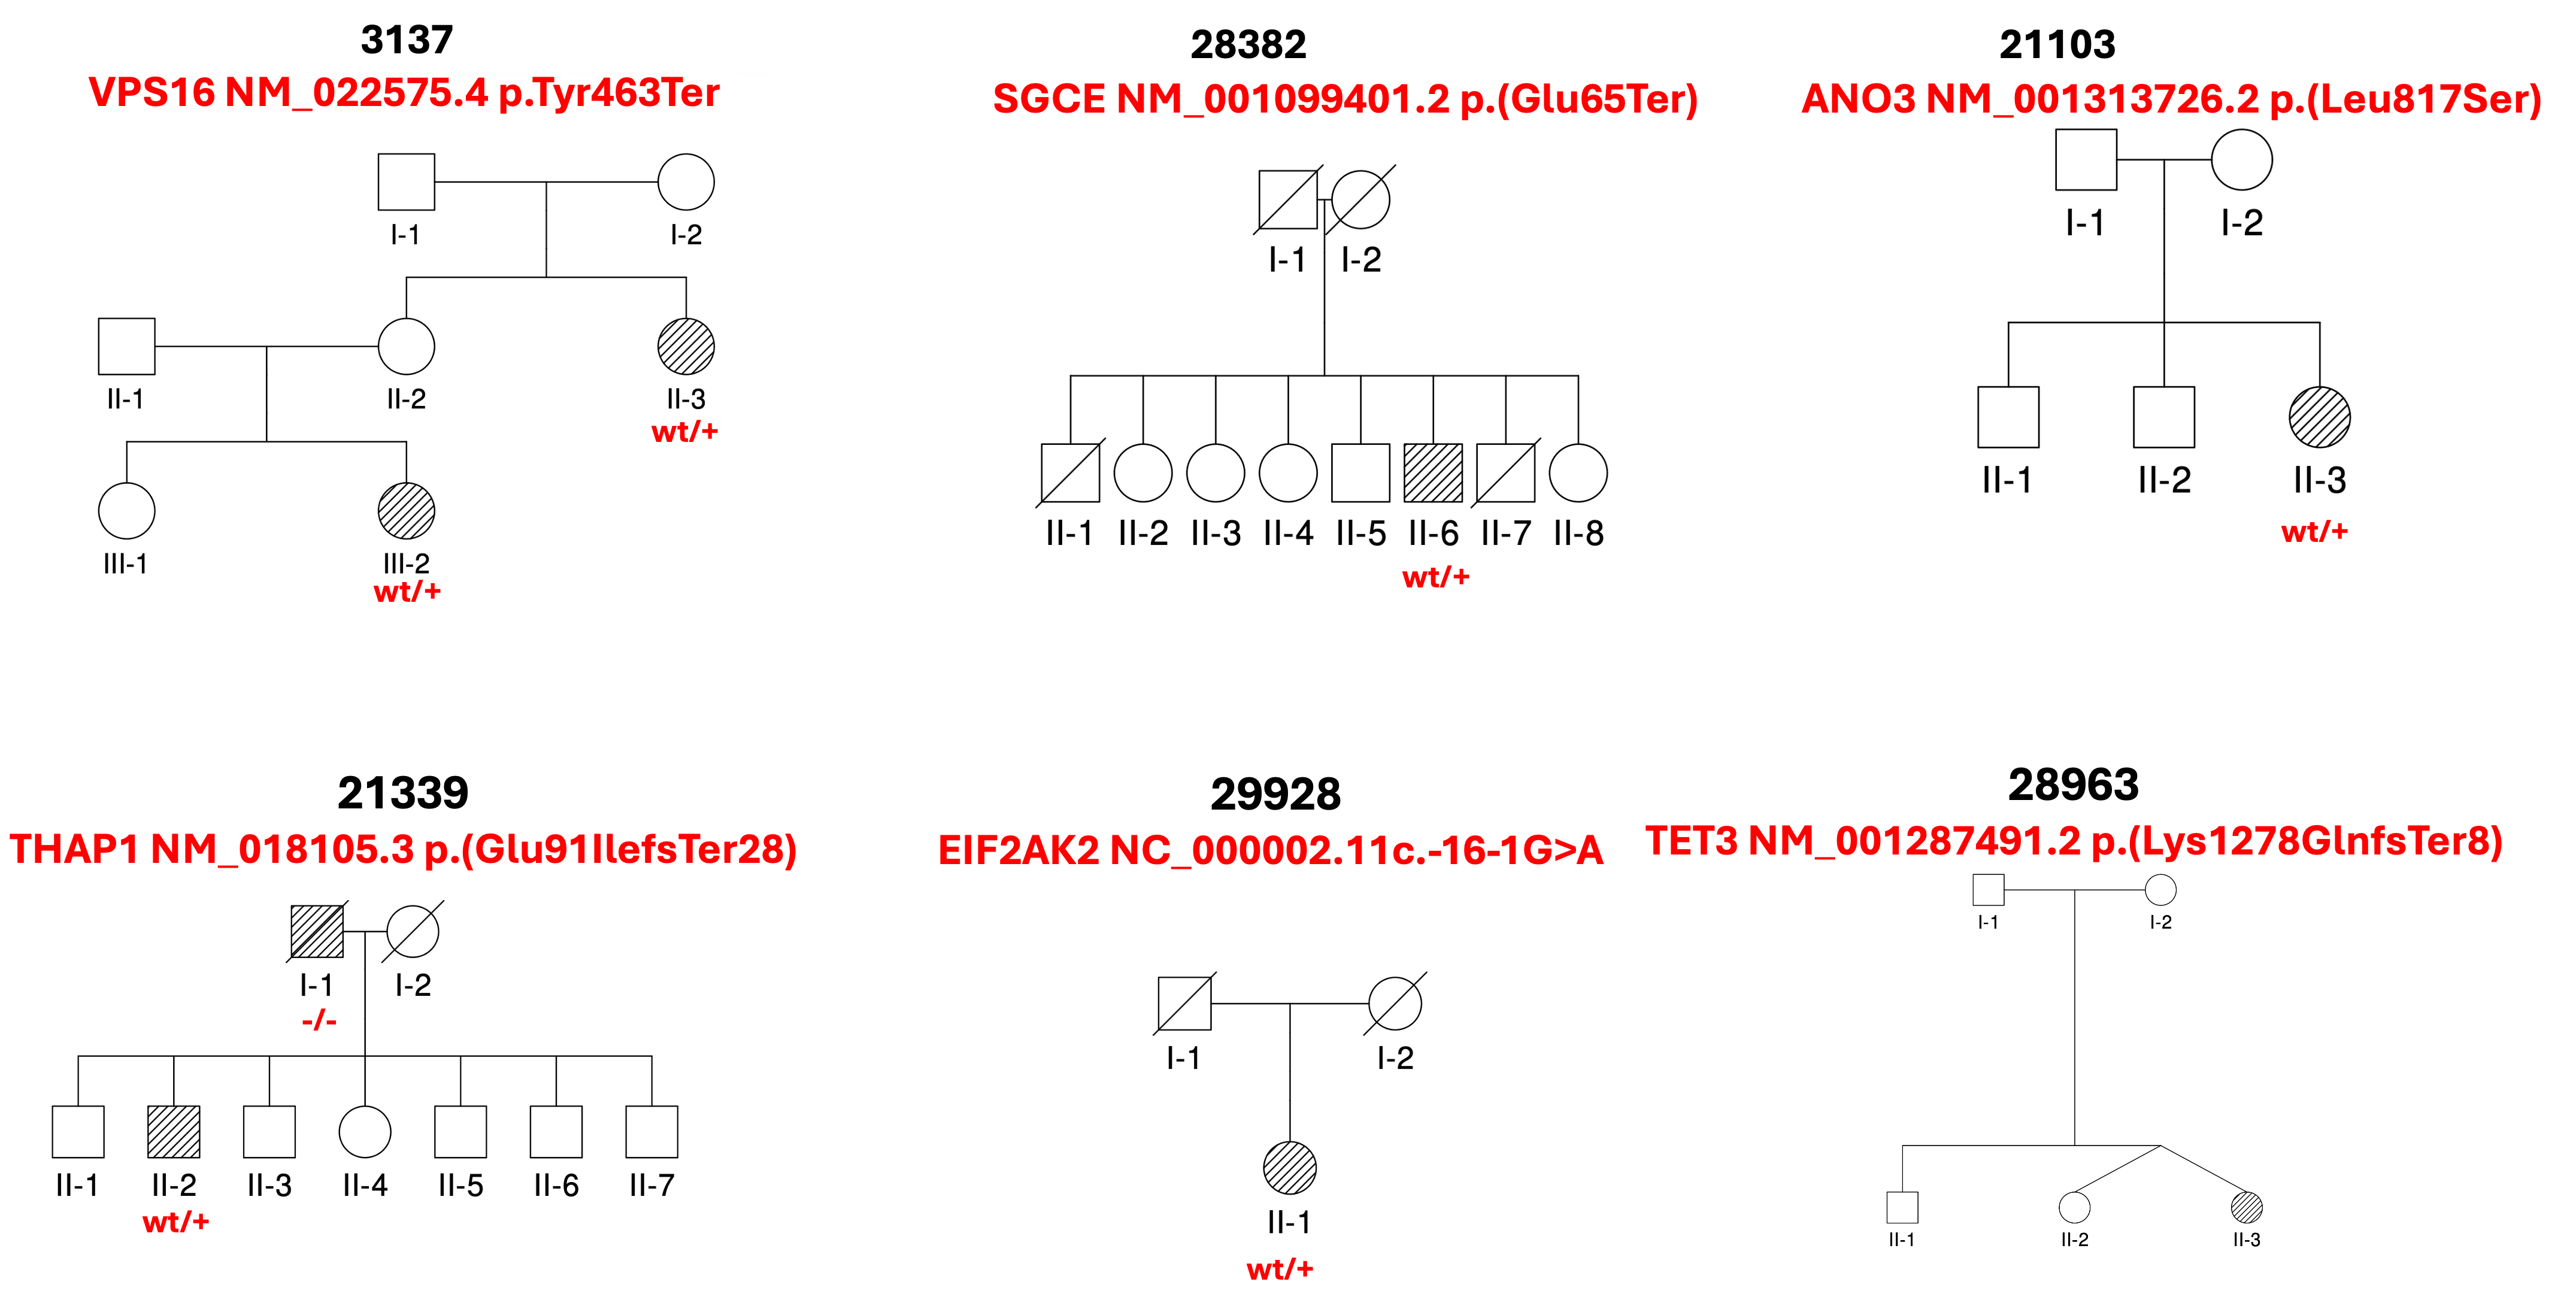


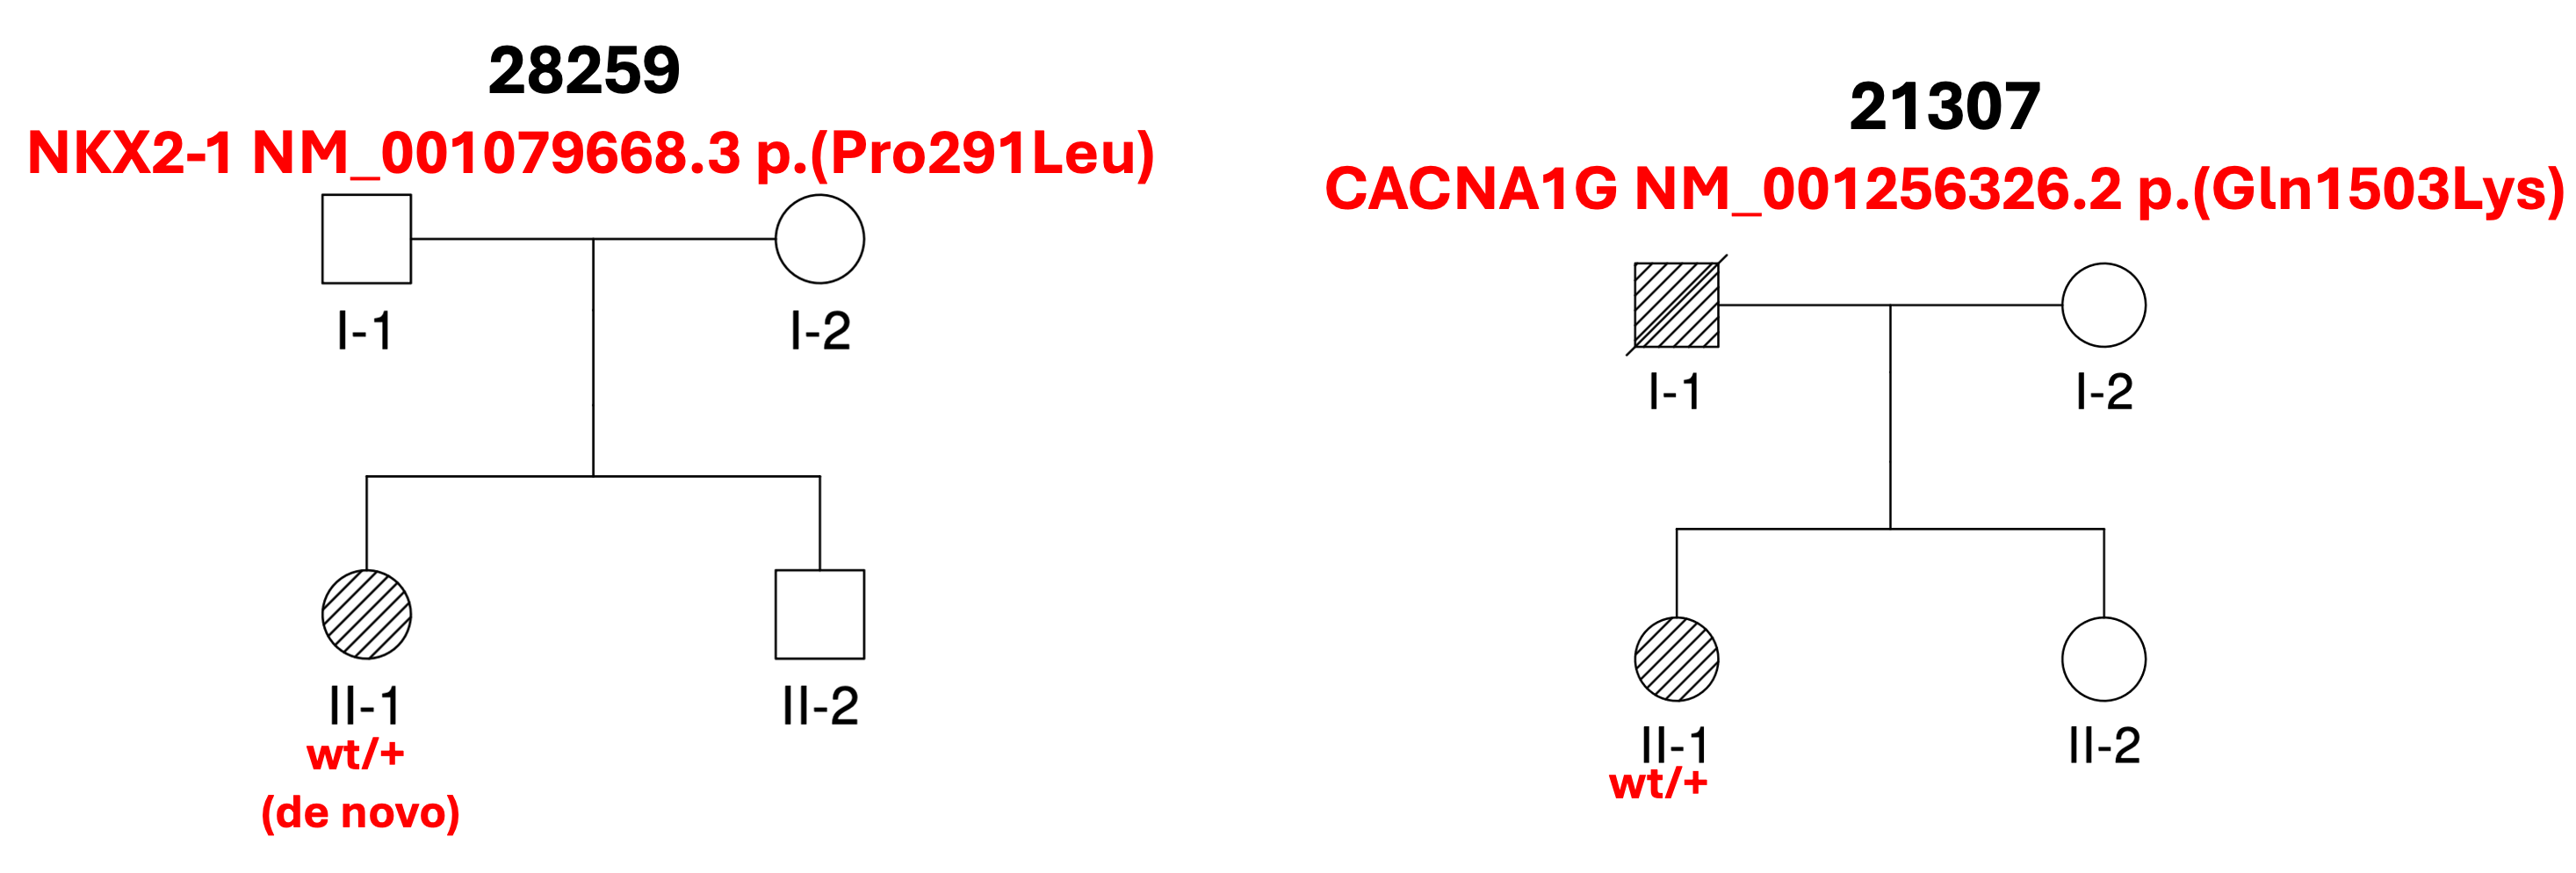


# **S4 Diagnostic rates and study populations in recent studies**


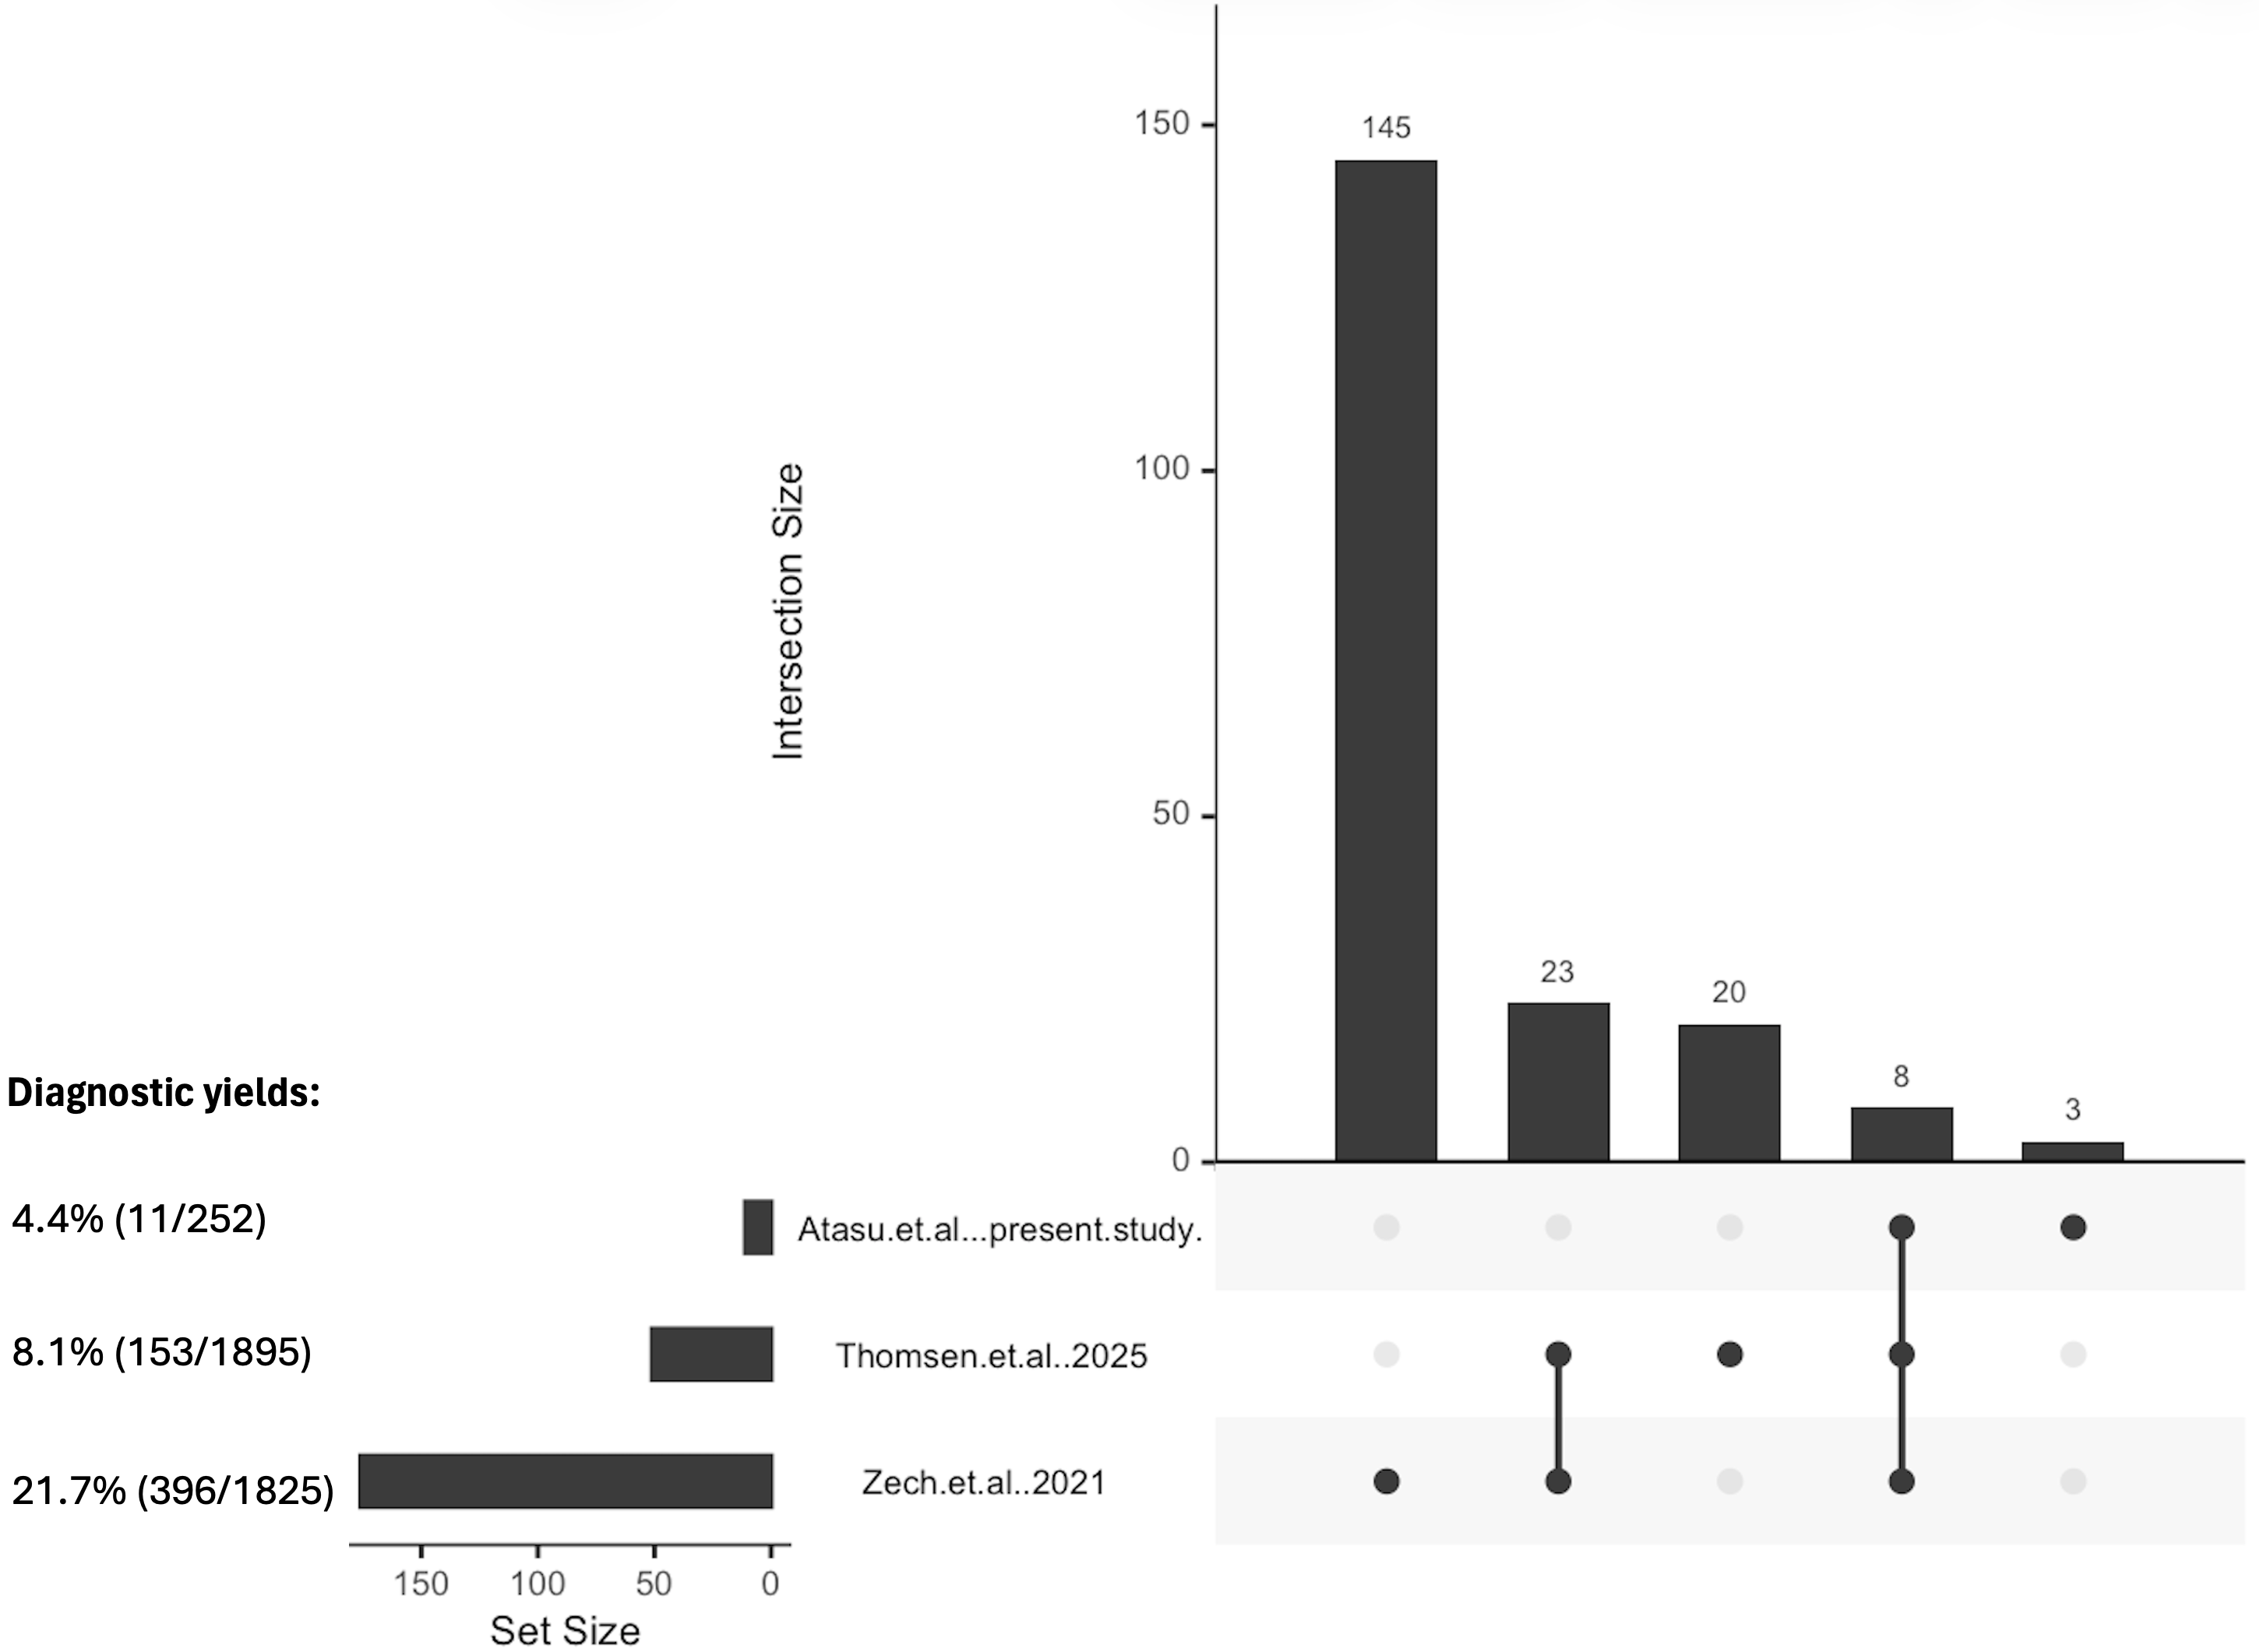


# **S5 List of the Common and Distinct Genes implicated in different diagnostic groups by study**

| Study | Gene List | Number of Genes |
| --- | --- | --- |
| Thomsen et al., 2025 | ACTB, ADCY5, AFG3L2, ANO3, ATL1, ATP1A3, C19orf12, CACNA1A, CHD6, CHMP2B, COL4A1, CTNNB1, EIF2AK2, EIF4A2, FTL, GCH1, GNAL, GNAO1, GNB1, GRN, IFIH1, IRF2BPL, KCNJ10, KCNMA1, KCNN2, KCNQ2, KCTD7, KIF1A, KLC1, KMT2B, MECP2, NKX2-1, NR4A2, PDE10A, PRKCG, PSEN1, SCN8A, SETX, SGCE, SLC2A1, SLC6A1, SPAST, SPR, TBP, TCF20, THAP1, TOR1A, TUBB4A, TWNK, VPS16, ZMYND11 | 51 |
| Zech et al., 2025 | ACTB, ADAR, ADCY5, AFG3L2, ALS2, ANK2, ANO3, AOPEP, ASXL3, ATL1, ATM, ATP1A3, ATP2B2, ATP5F1A, ATP5F1B, ATP5MC3, ATP7B, ATP8A2, AUTS2, BCL11B, BRAF, C19orf12, CACNA1A, CACNA1E, CAMK4, CAMTA1, CASK, CD40LG, CHD3, CHD4, CHD8, CNTNAP1, COQ8A, CP, CSDE1, CTNNB1, CUL3, CUX1, CWF19L1, DDC, DHCR24, DLG4, DLL1, DNAJC6, DNM1L, DNMT1, EBF3, ECHS1, EEF1A2, EIF2AK2, ERCC4, ERCC8, FA2H, FBXO31, FGF14, FITM2, FOXP2, FRMD5, FRYL, FTL, GABBR2, GABRA1, GAD1, GCH1, GJA1, GJC2, GNAL, GNB1, GRIA2, GRIA3, GRID2, GRIN1, GRIN2A, HECW2, HEXA, INTS11, IRF2BPL, KCNA2, KCNB1, KCNJ10, KCNMA1, KIF1A, KIF5A, KMT2B, LIG4, LRRK2, MAG, MATR3, MECP2, MECR, MED23, MICU1, MMAA, MORC2, MRE11, MSL3, NAA15, NARS2, NAV3, NEFL, NGLY1, NKX2-1, NPC1, NR4A2, NUP54, PANK2, PARK7, PCDH12, PDE10A, PDHA1, PINK1, PLA2G6, PNKD, PNPLA6, POLG, POLR1A, POLR3A, PPP2R5D, PPT1, PRKCG, PRKN, PRRT2, PSEN1, PTS, PURA, RALA, RARB, RERE, RHOBTB2, SATB1, SCN2A, SCO2, SCP2, SERAC1, SETX, SGCE, SHQ1, SLC19A3, SLC20A2, SLC2A1, SON, SOX2, SOX6, SPAST, SPG11, SPG7, SPR, SPTBN1, SRRM2, SYNE1, TBC1D24, TBX1, TCF20, TECPR2, TFE3, TH, THAP1, TMEM240, TOR1A, TTPA, TUBB4A, UBE3A, VLDLR, VPS16, WAC, WARS2, WASHC5, WDR73, WFS1, YY1, ZC4H2, ZEB2, ZMYND11, ZNF142, ZNF335 | 175 |
| Atasu et al. (present study) | TET3, SGCE, NKX2-1, CACNA1G, KMT2B, VPS16, GNAL, ANO3, THAP1, VPS4A, EIF2AK2 | 11 |
| Common genes in all three studies | SGCE, NKX2-1, KMT2B, VPS16, GNAL, ANO3, THAP1, EIF2AK2 | 8 |
| Common genes in Thomsen et al. (2025) and Zech et al. (2025) | ACTB, ADCY5, AFG3L2, ANO3, CACNA1A, CTNNB1, EIF2AK2, FTL, GCH1, GNAL, GNB1, IRF2BPL, KCNJ10, KCNMA1, KIF1A, KMT2B, NKX2-1, NR4A2, PDE10A, PRKCG, PSEN1, SETX, SGCE, SLC2A1, SPAST, SPR, TCF20, THAP1, TOR1A, VPS16, ZMYND11 | 31 |
